# Supplementary material
Source: PubMed Central journal article supplement (PMC7184565)
Supplement: mmc8.pdf [file mmc8.pdf]

**WORKSHEET for Evidence-Based Review of Science for Emergency Cardiac Care****Worksheet author(s)**

Anthony J Handley

**Date Submitted for review:** 13 September 2009**Clinical question.**

In BLS providers (P), does video self-instruction (I) compared with traditional instructor-led courses (C) improve skill acquisition and retention (O)?

**Is this question addressing an intervention/therapy, prognosis or diagnosis?** Intervention

**State if this is a proposed new topic or revision of existing worksheet:** New topic

**Conflict of interest specific to this question**

**Do any of the authors listed above have conflict of interest disclosures relevant to this worksheet?**

Co-author of one paper quoted (Jones et al 2007). Research and other studies published on subject of self-instruction.

**Search strategy (including electronic databases searched).****UPDATED SEARCH 16 AUGUST 2009****Medline (direct); Scopus: to 2009**

Basic life support OR BLS AND skill acquisition

Basic life support OR BLS AND video

Basic life support OR BLS AND self-instruction

Basic life support OR BLS AND DVD

Basic life support OR BLS AND instruction

1 hit Medline; 1 hit Embase - none relevant

1 hit Medline; 2 hits Embase – none relevant

0 hits Medline; 0 hits Embase

1 hit Medline; 8 hits Embase – none relevant

1 hit Medline; 3 hits Embase – none relevant

No hits on Cochrane; no further hits on EndNote

**End Note Library X1 2008**

Basic life support OR BLS AND video

Basic life support OR BLS AND instruction

Basic life support OR BLS AND distance-learning

Basic life support OR BLS AND teaching

CPR AND teaching

E-learning

Self-instruction

**Follow-up of references including citations via Scopus****Embase: 1974 – 2009 (April)**

Search strategies as for Medline

**Cochrane Database: To 2009**

None found

**• State inclusion and exclusion criteria**

All results to 16 August 2009

None for initial search

Review inclusion: Comparison of video/DVD/on-line self-instruction with instructor-led course

Review exclusion: AED only

**• Number of articles/sources meeting criteria for further review:**

734 papers met the above initial criteria; 69 papers were reviewed; 13 papers met the review inclusion criteria; 1 paper was subsequently discarded; 12 papers relevant.

**Updated search:** A further 12 papers met the criteria (some overlap Medline with Embase); 3 papers reviewed – none relevant to question.

## Summary of evidence

### Evidence Supporting Clinical Question

|                          |                                 |                   |                |          |          |
|--------------------------|---------------------------------|-------------------|----------------|----------|----------|
| <b>Good</b>              | Lynch 2005 E                    |                   |                |          |          |
| <b>Fair</b>              | Todd 1998 E<br>Einspruch 2007 E | Batcheller 2000 E | Braslow 1997 E |          |          |
| <b>Poor</b>              |                                 | Moule 2008 E      |                |          |          |
|                          | <b>1</b>                        | <b>2</b>          | <b>3</b>       | <b>4</b> | <b>5</b> |
| <b>Level of evidence</b> |                                 |                   |                |          |          |

A = Return of spontaneous circulation

C = Survival to hospital discharge

E = Other endpoint

B = Survival of event

D = Intact neurological survival

*Italics = Animal studies*

### Evidence Neutral to Clinical question

|                          |                |                                                  |          |          |          |
|--------------------------|----------------|--------------------------------------------------|----------|----------|----------|
| <b>Good</b>              | Todd 1999 E    |                                                  |          |          |          |
| <b>Fair</b>              | Reder 2006 E   | Lieberman 2000 E<br>Isbye 2006 E<br>Jones 2007 E |          |          |          |
| <b>Poor</b>              | Roppolo 2007 E |                                                  |          |          |          |
|                          | <b>1</b>       | <b>2</b>                                         | <b>3</b> | <b>4</b> | <b>5</b> |
| <b>Level of evidence</b> |                |                                                  |          |          |          |

A = Return of spontaneous circulation

C = Survival to hospital discharge

E = Other endpoint

B = Survival of event

D = Intact neurological survival

*Italics = Animal studies*

### Evidence Opposing Clinical Question

|                          |               |          |          |          |          |
|--------------------------|---------------|----------|----------|----------|----------|
| <b>Good</b>              |               |          |          |          |          |
| <b>Fair</b>              |               |          |          |          |          |
| <b>Poor</b>              | Dracup 1998 E |          |          |          |          |
|                          | <b>1</b>      | <b>2</b> | <b>3</b> | <b>4</b> | <b>5</b> |
| <b>Level of evidence</b> |               |          |          |          |          |

A = Return of spontaneous circulation

C = Survival to hospital discharge

E = Other endpoint

B = Survival of event

D = Intact neurological survival

*Italics = Animal studies*

**REVIEWER'S FINAL COMMENTS AND ASSESSMENT OF BENEFIT / RISK:**

Five studies (3 LOE 1: Lynch 2005, 31; Todd 1998, 364; Einspruch 2007, 476. 1 LOE 2: Batcheller 2000, 101. 1 level 3: Braslow 1997, 207) showed that subjects self-taught CPR by use of a video (8-34 min duration) have significantly better skills at the end of training than those attending a traditional, instructor-led course of 1-6 hours duration. The skills acquired through self-instruction deteriorate, but at about the same speed as those acquired through an instructor-led course.

A single study (LOE 2: Moule 2008, 427) showed that healthcare professionals learnt BLS/AED theory as well from an e-learning program as from an instructor.

Six studies (3 LOE 1: Todd 1999, 730; Reder 2006, 443; Roppolo 2007, 276. 3 LOE 2: Liberman 2000, 249; Isbye 2006, 435; Jones 2007, 350) showed no significant difference in skill acquisition and/or retention for video (interactive computer program in one case), self-instruction or instructor-led teaching, but the tendency was for video self-instruction to give better results.

A single study (LOE 1: Dracup 1998, 170) showed better infant CPR skill acquisition after instructor-led training than video, but study protocol had deficiencies.

Although different studies identified certain skills that appeared to be better acquired by self-instruction or instructor-led training, the skills were not consistent from study to study and no conclusions can be drawn.

Most studies included manikin practice for both self- and instructor- training, but one study (Reder 2006, 443) showed better skills when the subjects had hands-on practice.

### *Citation List*

**Batcheller A M, Brennan RT, Braslow A, Urrutia A, Kaye W. Cardiopulmonary resuscitation performance of subjects over forty is better following half-hour video self-instruction compared to traditional four-hour classroom training." Resuscitation 2000; 43: 101-110.**

*Level 2; fair; supporting: 34-minute self-instruction video compared with instructor-led course (?up to 4 hours) in lay volunteers. Randomized but course cancelled and some other volunteers re-allocated; poor overall randomization. Skills tested immediately after course (acquisition, not retention). Highly significant benefit for video group for overall skills, correct compressions, and correct ventilation.*

**Braslow A, Brennan RT, Newman MM, Bircher NG, Batcheller AM, Kaye W. CPR training without an instructor: development and evaluation of a video self-instructional system for effective performance of cardiopulmonary resuscitation. Resuscitation 1997; 34: 207-220.**

*Level 3; fair; supportive: 34-minute practice-as-you-watch video compared with 3-4hour instructor-led course. Pilot video and revised version used – revised version more effective. No randomization. More healthcare workers and more with previous BLS training in instructor-led group. Tested immediately and 60 days after training. Skill acquisition significantly better for video group; 60-day testing showed better results for video group, but not significant.*

**Dracup K, Moser DK, Doering LV, Guzy PM. Comparison of cardiopulmonary resuscitation training methods for parents of infants at high risk for cardiopulmonary arrest. Ann Emerg Med 1998; 32: 170-177.**

*Level 1; poor; opposing: 480 parents of at-risk infants taught CPR. Randomized to instructor-led + video, instructor-led + social discussion+ video, video alone. Significantly more successful if instructor-led. No pre-allocation comparison of groups; no details of randomization; no details of course and/or video duration; instructor-led training also received video.*

**Einspruch EL, Lynch B, Aufderheide TP, Nichol G, Becker L. Retention of CPR skills learned in a traditional AHA Heartsaver course versus 30-min video self-training: A controlled randomized study. Resuscitation 2007; 74: 476-486.**

*Level 1; fair; supportive: Follow-up of Lynch 2005 study (see below). Volunteers re-tested 2 months after training (retention). Skill scores decayed in both groups compared with immediate testing, but remained better than original control. Self-trained (video) group still showed better overall skill level, but no statistical comparison between them is given.*

**Isbye DL, Rasmussen LS, Lippert FK, Rudolph SF, Ringsted CV. Laypersons may learn basic life support in 24 min using a personal resuscitation manikin. Resuscitation 2006; 69: 435-442**

*Level 2; fair; neutral: 24-min DVD-based self-instruction compared with 6-hour instructor-led course. Laypersons without BLS training within 5 years randomized according to place of work. DVD group also took manikin home for further practice. Feedback device (CPR Coach) used by DVD group. Tested at 3 months. Ventilation volume and compression depth greater in DVD group, but overall no difference.*

**Jones I, Handley AJ, Whitfield R, Newcombe R, Chamberlain D. A preliminary feasibility study of a short DVD-based distance-learning package for basic life support. Resuscitation 2007; 75: 350-356.**

*Level 2; fair; neutral: Lay volunteers who had requested CPR training. Allocated according to place of training (not true randomization). 8-minute video (up to 15-min training) compared with 1-hour instructor-led course. Tested before and immediately after training. Overall no significant difference in post-training skills, but video group displayed less deep compressions and more hands-off time.*

**Lieberman M, Golberg N, Mulder D, Sampalis J. Teaching cardiopulmonary resuscitation to CEGEP students in Quebec--a pilot project. Resuscitation 2000; 47: 249-257.**

*Level 2; fair; neutral: Nursing students randomized into 4 groups: 11-minute video + unlimited time on manikin; 2 instructor-led courses (different student:manikin ratios); 2-hr practical teaching. Tested immediately after training and at 17 weeks. No overall difference in skill scores.*

**Lynch B, Einspruch EL, Nichol G, Becker LB, Aufderheide TP, Idris A. Effectiveness of a 30-min CPR self-instruction program for lay responders: a controlled randomized study. Resuscitation 2005; 67: 31-43.**

*Level 1; good; supportive: Lay volunteers aged 40-70 – no BLS training within 5 years. Randomized. 22-minute video (plus manikin & feedback of compression depth) compared with 3-4 hour Heartsaver, instructor-led course. Control group. Tested immediately after training. Video group had better overall skills (acquisition) than instructor-led ( $p=0.031$ ) but both better than control.*

**Moule P, Albarran JW, Bessant E, Brownfield C, Pollock J. A non-randomized comparison of e-learning and classroom delivery of basic life support with automated external defibrillator use: A pilot study International Journal of Nursing Practice 2008; 14: 427-434.**

*Level 2; poor; supportive: Healthcare professionals (mental health) allocated to 2.5h lecture or 3h e-learning programme (not specified). Both groups then received 1h instructor-led practical training. No randomization. Groups unequal numbers and professional mix. MCQ and performance tests pre- and post-training. Both groups had better theory and practical scores after training. E-learning group had tendency to better practical performance but no statistical difference between groups.*

**Reder S, Cummings P, Quan L. Comparison of three instructional methods for teaching cardiopulmonary resuscitation and use of an automatic external defibrillator to high school students. Resuscitation 2006; 69: 443-453.**

*Level 1; fair; neutral: High-school children. 45-min interactive computer programme vs. 45-minute computer programme plus 45 mins of instructor training vs. 45min x 2 instructor training vs. control (no teaching). Tested 2 days after training and 2 months later. Those that received hands-on training performed better than those without, but otherwise little difference in skill performance. Interactive computer programme led to better knowledge.*

**Roppolo LP, Pepe PE, Campbell L, Ohman K, Kulkarni H, Miller R, Idris A, Bean L, Bettes TN, Idris AH. Prospective, randomized trial of the effectiveness and retention of 30-min layperson training for cardiopulmonary resuscitation and automated external defibrillators – The American Airlines Study. Resuscitation 2007; 74: 276-285.**

*Level 1; poor; neutral: Laypeople without CPR training within 5 years randomized to 23-min video + demonstrations of choking management + use of feedback device and use of AED, or 3-4 Hour Heartsave AED, instructor-led course. Tested immediately after training and at 6 months. No significant difference between the skills immediately after training or 6 months later. Confused by additional skills and feedback device.*

**Todd KH, , Braslow A, Brennan RT, Lowery DW, Cox RJ, Lipscomb LE, Kellerman AL. Randomized, controlled trial of video self-instruction versus traditional CPR training. Ann Emerg Med 1998; 31: 364-369.**

*Level 1, fair, supportive: Medical students. 34-min video + manikin compared with 4-hr Heartsaver instructor-led course. Randomized. Tested 2-6 weeks after training (average time same for each group). Overall scores for 14 skills significantly better for video group.*

**Todd KH, Heron SL, Thompson M, Dennis R, O'Connor J, Kellerman AL. Simple CPR: a randomized, controlled trial of video self-instructional cardiopulmonary resuscitation training in an African American church congregation. Ann Emerg Med 1999; 34: 730-737.**

*Level 1, good, neutral: Adults from a church congregation. Randomized to 34-min video self-instruction + simple manikin compared with 4-hour Heartsaver course. Tested 1+ month after training. Generally skills were poor, but no significant difference between the groups except for position on chest which was significantly better performed by video group.*
