# Supplementary material
Source: PubMed Central journal article supplement (PMC7184565)
Supplement: mmc34.pdf [file mmc34.pdf]

**WORKSHEET for Evidence-Based Review of Science for Emergency Cardiac Care****Worksheet author(s)**

Gavin Perkins, Farhan Bhanji

**Date Submitted for review:**

Originally submitted for review 11-10-09  
 Presented to TF n Osaka, March 2009 and other questions formulated  
 GDP WS EIT021A accepted by PM Jan 2010  
 FB search strategy added to produce a single WS 5-2-10  
 Submitted 6 Feb 2010

**Clinical question.**

EIT 021 AB - In participants undergoing BLS/ALS courses (P), does end of course testing (I), as opposed to continuous assessment and feedback (C), improve outcomes (eg. improve learning/performance) (O)?

**Is this question addressing an intervention/therapy, prognosis or diagnosis? Intervention**

**State if this is a proposed new topic or revision of existing worksheet: New**

**Conflict of interest specific to this question**

Do any of the authors listed above have conflict of interest disclosures relevant to this worksheet? No

**Search strategy (including electronic databases searched).**

PERKINS 10 OCT 2009

Strategy 1: (testing OR assessment OR examination) AND (cardiopulmonary resuscitation [Mesh] AND training)

Databases searched: Cochrane library; Medline; OVID; EMBase; AHA endnote

Strategy 2: "Cardiopulmonary Resuscitation/education"[Majr] AND ("Educational Measurement"[Mesh] OR "Feedback"[Mesh]) OR "Retention (Psychology)"[Mesh] Database searched: Medline

Embase: (defibrillation OR 'heart arrest' OR 'resuscitation'/exp) AND (bls OR als OR course OR 'training'/exp) AND (testing OR end-of-course OR final AND exam\* OR 'continuous assessment' OR feedback OR 'ongoing assessment' AND [embase]/lim)

Strategy 3 "cardiopulmonary resuscitation"[MeSH] AND ("Educational Measurement"[Mesh] OR "Feedback"[Mesh] OR "Retention (Psychology)"[Mesh]) Databases searched: Medline via pubmed

BHANJI

Databases searched (up to Oct 16 2009)

Pubmed, EMBASE, AHA endnote library and cochrane library.

Pubmed (up to Oct 16<sup>th</sup> 2009)

("Cardiopulmonary Resuscitation"[Mesh]

OR

Pediatric Life Support OR Paediatric Life Support OR pediatric resuscitation OR paediatric resuscitation OR Neonatal Resuscitation OR Advanced Trauma Life Support OR basic life support Field: Text Word)

AND

"Educational Measurement"[Mesh]

n.b. since educational measurement is a Mesh subheading of "education", limiting the first part of the search to "education" did not result in a narrowing of the results

n.b. a 'text word' search was completed for terms that did not have readily identifiable Mesh terms.

Embase Classic and EMBASE (1947 to Oct 16<sup>th</sup> 2009)

("Resuscitation" [Subject heading]

OR

(pediatric life support OR paediatric life support OR pediatric resuscitation OR paediatric resuscitation OR neonatal resuscitation OR advanced trauma life support OR basic life support) [Keywords]

AND

"Education" [Subject heading]

AHA endnote library (2009 library)

Searched for keyword 'education'

#### State inclusion and exclusion criteria

Perkins:

Inclusion criteria: studies evaluating impact of continuous versus end of course assessment on learning outcomes during advanced or basic life support training.

Training involving face to face instructor led, self instruction, electronic learning, skills training, simulation

Basic life support and advanced life support type courses addressing cardiac resuscitation. Other courses addressing principles of resuscitation training (e.g. Advanced trauma life support; neonatal life support etc).

Exclusion criteria: studies not examining assessment in the context of resuscitation training in its broadest sense

Bhanji:

Inclusion criteria: studies evaluating impact of assessment on learning outcomes during advanced or basic life support training.

Training could involve face to face instructor led, self instruction, electronic learning, skills training, simulation or other form of resuscitation training

Included basic life support and advanced life support type courses addressing cardiac resuscitation (including neonatal and pediatric resuscitation). Also included other courses addressing principles of resuscitation training (e.g. advanced trauma life support).

Exclusion criteria: studies not examining assessment in the context of 'resuscitation training'

#### • Number of articles/sources meeting criteria for further review:

Perkins:

Search strategy 1: Cochrane library – no hits; : Medline / Embase; Cardiopulmonary resuscitation AND training : 1008 hits Testing OR assessment OR examination : 1317892 hits Combined: 188 Removal of duplicates 187 Strategy run Feb 2009

From review of titles and abstracts 5 papers were identified as potentially relevant. After detailed review of the papers – none addressed the PICO question

Search strategy 2 (Jan 2009):

"Cardiopulmonary Resuscitation/education"[Majr] AND ("Educational Measurement"[Mesh] OR "Feedback"[Mesh]) OR "Retention (Psychology)"[Mesh] – Medline – 232 hits

(defibrillation OR 'heart arrest' OR 'resuscitation'/exp) AND (bls OR als OR course OR 'training'/exp)AND (testing OR end-of-course OR final AND exam\* OR 'continuous assessment' OR feedback OR 'ongoing assessment' AND [embase]/lim) EMBASE – 71 hits

This search strategy similarly failed to identify any relevant articles

Search strategy 3 (run 10-10-09): 429 articles identified, of which review of abstracts identified 6 articles studies for further review. However, review of full text failed to identify any articles relevant to this PICO question

Bhanji:

1098 hits from Pubmed and Endnote searches (740 from Pubmed and 377 from Embase)

1059 hits from AHA endnote library

No hits from Cochrane library

# Summary of evidence

## Evidence Supporting Clinical Question

|                          |          |          |          |          |          |
|--------------------------|----------|----------|----------|----------|----------|
| <b>Good</b>              |          |          |          |          |          |
| <b>Fair</b>              |          |          |          |          |          |
| <b>Poor</b>              |          |          |          |          |          |
|                          | <b>1</b> | <b>2</b> | <b>3</b> | <b>4</b> | <b>5</b> |
| <b>Level of evidence</b> |          |          |          |          |          |

A = Return of spontaneous circulation  
 B = Survival of event

C = Survival to hospital discharge  
 D = Intact neurological survival

E = Other endpoint  
*Italics = Animal studies*

## Evidence Neutral to Clinical question

|                          |          |          |          |          |          |
|--------------------------|----------|----------|----------|----------|----------|
| <b>Good</b>              |          |          |          |          |          |
| <b>Fair</b>              |          |          |          |          |          |
| <b>Poor</b>              |          |          |          |          |          |
|                          | <b>1</b> | <b>2</b> | <b>3</b> | <b>4</b> | <b>5</b> |
| <b>Level of evidence</b> |          |          |          |          |          |

A = Return of spontaneous circulation  
 B = Survival of event

C = Survival to hospital discharge  
 D = Intact neurological survival

E = Other endpoint  
*Italics = Animal studies*

## Evidence Opposing Clinical Question

|                          |          |          |          |          |          |
|--------------------------|----------|----------|----------|----------|----------|
| <b>Good</b>              |          |          |          |          |          |
| <b>Fair</b>              |          |          |          |          |          |
| <b>Poor</b>              |          |          |          |          |          |
|                          | <b>1</b> | <b>2</b> | <b>3</b> | <b>4</b> | <b>5</b> |
| <b>Level of evidence</b> |          |          |          |          |          |

A = Return of spontaneous circulation  
 B = Survival of event

C = Survival to hospital discharge  
 D = Intact neurological survival

E = Other endpoint  
*Italics = Animal studies*

**REVIEWER'S FINAL COMMENTS AND ASSESSMENT OF BENEFIT / RISK:**

No studies have compared the impact of continuous versus end of course assessments in the context of resuscitation training

Knowledge gaps: There is a need for further studies to examine the role and optimal type of assessments as tools to promote learning resuscitation skills

**Acknowledgements:**

Vanessa Perez, Librarian, American Heart Association

Dr Peter Morley, Reviewing Editor, ILCOR

*Citation List*
